# Supplementary material for: Genome-Wide Identification and Functional Analysis of the Roles of SAUR Gene Family Members in the Promotion of Cucumber Root Expansion
Source: MDPI journal article supplement (doi:10.3390/ijms24065940), 2023-03-21
Supplement: s1 [file s1]

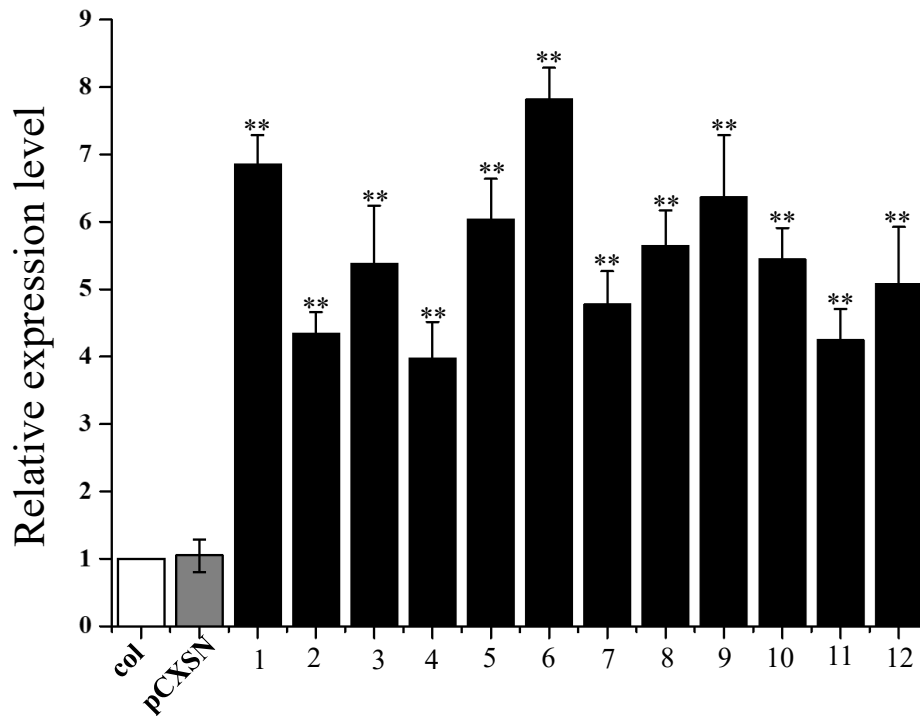

Figure S1: *CsSAUR31* levels in the control (Col), empty vector(pCXSN) and *CsSAUR31*-overexpressing (S) plants were screened by RT-qPCR. (\*\* $p < 0.01$  by Student's t-test)

Table S1. Sequences of the oligo nucleotides used in this study

| Oligo name   | Oligo sequence (5'→ 3')  | Description                                    | Gene ID              |
|--------------|--------------------------|------------------------------------------------|----------------------|
| CsSAUR31-F   | TTTGAGGTTGCCGTGTGAAG     | RT-qPCR analysis                               | CsaV3_3G04730<br>0.1 |
| CsSAUR31-R   | GCACATTGGACTCTGTGGAC     |                                                |                      |
| PCXSN-1250-F | ATGGATTCAAATGCAAAGAAGTCC | <i>CsSAUR31</i><br>overexpression<br>detection |                      |
| PCXSN-1250-R | CTATCTGCACATTGGACTCTGTGG |                                                |                      |

Table S2. Information of 62 *SAUR* genes, including the accession number, location (in which chromosome), length, molecular mass and pI

| Gene name      | Accession number | Chromosome | Length<br>(a.a.) | Molecular<br>weight<br>(kDa) | pI   | Instability<br>Index | Grand<br>Average of<br>Hydropathicity |
|----------------|------------------|------------|------------------|------------------------------|------|----------------------|---------------------------------------|
| <i>CsSAUR1</i> | CsaV3_1G009830.1 | 1          | 158              | 17199.65                     | 8.67 | 42.07                | -0.304                                |

|          |                  |   |     |          |       |       |        |
|----------|------------------|---|-----|----------|-------|-------|--------|
| CsSAUR2  | CsaV3_1G013410.1 | 1 | 143 | 16173.61 | 6.91  | 40.69 | -0.464 |
| CsSAUR3  | CsaV3_2G015370.1 | 2 | 153 | 17254.82 | 9.66  | 67.52 | -0.409 |
| CsSAUR4  | CsaV3_2G015380.1 | 2 | 103 | 11617.36 | 6.4   | 61.59 | -0.284 |
| CsSAUR5  | CsaV3_2G015400.1 | 2 | 97  | 10959.63 | 8.69  | 21.94 | -0.17  |
| CsSAUR6  | CsaV3_2G015410.1 | 2 | 97  | 10937.86 | 9.58  | 39.83 | -0.003 |
| CsSAUR7  | CsaV3_2G015420.1 | 2 | 95  | 10598.18 | 7.77  | 29.35 | -0.007 |
| CsSAUR8  | CsaV3_2G015430.1 | 2 | 95  | 10616.14 | 7.87  | 59.19 | -0.168 |
| CsSAUR9  | CsaV3_2G015450.1 | 2 | 95  | 10904.59 | 9.43  | 48.53 | -0.266 |
| CsSAUR10 | CsaV3_2G015460.1 | 2 | 97  | 10939.7  | 9.14  | 54.31 | -0.112 |
| CsSAUR11 | CsaV3_2G015480.1 | 2 | 97  | 10716.42 | 9.25  | 63.88 | -0.074 |
| CsSAUR12 | CsaV3_2G015490.1 | 2 | 97  | 10859.66 | 9.03  | 46.44 | -0.138 |
| CsSAUR13 | CsaV3_2G015500.1 | 2 | 132 | 14787.96 | 9.3   | 55.71 | -0.124 |
| CsSAUR14 | CsaV3_2G015510.1 | 2 | 97  | 10939.66 | 8.89  | 42.31 | -0.134 |
| CsSAUR15 | CsaV3_2G015520.1 | 2 | 97  | 10897.68 | 9.39  | 51.55 | -0.099 |
| CsSAUR16 | CsaV3_2G015530.1 | 2 | 97  | 10884.73 | 9.03  | 44.59 | -0.085 |
| CsSAUR17 | CsaV3_2G015540.1 | 2 | 97  | 10983.78 | 8.85  | 40.95 | -0.057 |
| CsSAUR18 | CsaV3_2G015550.1 | 2 | 97  | 11127.07 | 9.37  | 43.93 | -0.032 |
| CsSAUR19 | CsaV3_2G015560.1 | 2 | 97  | 10838.66 | 9.62  | 51.49 | -0.021 |
| CsSAUR20 | CsaV3_2G015570.1 | 2 | 97  | 10886.78 | 8.79  | 45.01 | 0.054  |
| CsSAUR21 | CsaV3_2G015580.1 | 2 | 92  | 10518.37 | 9.51  | 43.77 | -0.116 |
| CsSAUR22 | CsaV3_2G015590.1 | 2 | 205 | 23406.58 | 9.33  | 50.84 | -0.061 |
| CsSAUR23 | CsaV3_2G015600.1 | 2 | 97  | 10957.82 | 9.44  | 61.32 | -0.079 |
| CsSAUR24 | CsaV3_2G015610.1 | 2 | 97  | 11034.93 | 9.69  | 52.49 | -0.086 |
| CsSAUR25 | CsaV3_2G029400.1 | 2 | 115 | 13047.06 | 9.15  | 58.24 | -0.309 |
| CsSAUR26 | CsaV3_3G003060.1 | 3 | 153 | 17745.7  | 10.38 | 33.62 | -0.436 |
| CsSAUR27 | CsaV3_3G007730.1 | 3 | 109 | 12881.54 | 8.96  | 62.43 | -0.962 |
| CsSAUR28 | CsaV3_3G030900.1 | 3 | 101 | 11334.93 | 6.02  | 48.94 | -0.091 |
| CsSAUR29 | CsaV3_3G045710.1 | 3 | 200 | 22858.37 | 9.58  | 73.52 | -0.374 |
| CsSAUR30 | CsaV3_3G045730.1 | 3 | 100 | 11587.62 | 10.29 | 66.57 | -0.389 |
| CsSAUR31 | CsaV3_3G047300.1 | 3 | 141 | 15548.04 | 9.57  | 41.64 | -0.32  |
| CsSAUR32 | CsaV3_4G031250.1 | 4 | 113 | 13701.69 | 8.54  | 65.14 | -0.864 |
| CsSAUR33 | CsaV3_4G031860.1 | 4 | 150 | 17398.53 | 4.85  | 58.2  | -0.649 |
| CsSAUR34 | CsaV3_5G000180.1 | 5 | 121 | 14261.21 | 7.05  | 34.71 | -0.464 |
| CsSAUR35 | CsaV3_5G027650.1 | 5 | 167 | 18882.37 | 5.45  | 52.28 | -0.585 |
| CsSAUR36 | CsaV3_6G001030.1 | 6 | 176 | 20852.25 | 10.28 | 59.76 | -0.557 |
| CsSAUR37 | CsaV3_6G007970.1 | 6 | 746 | 86253.06 | 6.4   | 49.54 | -0.498 |
| CsSAUR38 | CsaV3_6G008790.1 | 6 | 159 | 18513.11 | 9.54  | 47.57 | -0.784 |
| CsSAUR39 | CsaV3_6G013600.1 | 6 | 159 | 18108.83 | 9.63  | 58.09 | -0.306 |
| CsSAUR40 | CsaV3_6G014200.1 | 6 | 154 | 17186.25 | 4.77  | 58    | -0.505 |
| CsSAUR41 | CsaV3_6G036570.1 | 6 | 162 | 18887.15 | 8.96  | 42.77 | -0.291 |
| CsSAUR42 | CsaV3_6G039880.1 | 6 | 143 | 16650.2  | 5.34  | 56.41 | -0.212 |
| CsSAUR43 | CsaV3_6G040760.1 | 6 | 340 | 17175.71 | 6.91  | 45.47 | -0.227 |

|          |                  |   |     |          |         |       |        |
|----------|------------------|---|-----|----------|---------|-------|--------|
| CsSAUR44 | CsaV3_6G047000.1 | 6 | 385 | 12193.05 | 8.93    | 57.42 | -0.301 |
| CsSAUR45 | CsaV3_7G000560.1 | 7 | 374 | 17111.59 | 10.04   | 80.53 | -0.399 |
| CsSAUR46 | CsaV3_7G000570.1 | 7 | 486 | 10289.99 | 8.8     | 54.22 | -0.266 |
| CsSAUR47 | CsaV3_7G000580.1 | 7 | 352 | 9473.87  | 7.83    | 43.71 | -0.248 |
| CsSAUR48 | CsaV3_7G000590.1 | 7 | 212 | 10663.13 | 6.71    | 59.9  | -0.148 |
| CsSAUR49 | CsaV3_7G000600.1 | 7 | 274 | 11224.57 | 5.04    | 58.63 | -0.532 |
| CsSAUR50 | CsaV3_7G000620.1 | 7 | 239 | 12799.42 | 5.73    | 54.01 | -0.413 |
| CsSAUR51 | CsaV3_7G000630.1 | 7 | 213 | 10943.42 | 6.72    | 55.57 | -0.305 |
| CsSAUR52 | CsaV3_7G000650.1 | 7 | 299 | 11158.69 | 6.06    | 52.5  | -0.225 |
| CsSAUR53 | CsaV3_7G000660.1 | 7 | 262 | 10194.93 | 8.91    | 44.69 | -0.043 |
| CsSAUR54 | CsaV3_7G000680.1 | 7 | 140 | 18438.28 | 9.04    | 37.57 | -0.23  |
| CsSAUR55 | CsaV3_7G000690.1 | 7 | 196 | 79309.37 | 4.86    | 44.78 | -0.778 |
| CsSAUR56 | CsaV3_7G000700.1 | 7 | 461 | 19409.84 | 9.36    | 51.58 | -0.024 |
| CsSAUR57 | CsaV3_7G000710.1 | 7 | 295 | 11306    | 7.81    | 23.48 | -0.068 |
| CsSAUR58 | CsaV3_7G000720.1 | 7 | 327 | 12819.65 | 6.8349  | 39.54 | -0.281 |
| CsSAUR59 | CsaV3_7G001480.1 | 7 | 168 | 17460.54 | 9.7743  | 60.99 | 0.013  |
| CsSAUR60 | CsaV3_7G022810.1 | 7 | 153 | 14460.62 | 9.4923  | 87.94 | -0.192 |
| CsSAUR61 | CsaV3_7G033620.1 | 7 | 155 | 18153.91 | 10.2848 | 55.04 | -0.494 |
| CsSAUR62 | CsaV3_7G034130.1 | 7 | 327 | 13791.74 | 6.8349  | 46.98 | -0.011 |

**Table S3. Information for some *cis*-elements**

| Gene name | TG A-element | AuxR-core | AUXRE | ABRE | TATC-box | P-box | GA REMOTIF | TCA-element | TGAC-motif | CGTCA-motif | GC-motif | ARE | MBS | LTR | TC-rich repeats | sum |
|-----------|--------------|-----------|-------|------|----------|-------|------------|-------------|------------|-------------|----------|-----|-----|-----|-----------------|-----|
| CsSAUR1   |              |           |       | 1    |          |       | 1          | 1           |            |             |          | 1   |     | 1   | 1               | 6   |
| CsSAUR2   |              |           |       | 1    |          |       |            | 1           |            |             |          | 1   |     |     | 1               | 4   |
| CsSAUR3   | 1            |           |       | 1    |          |       |            | 1           | 1          | 1           |          | 1   | 1   |     |                 | 7   |
| CsSAUR4   | 1            |           |       | 1    |          |       | 1          | 1           |            |             |          | 1   |     |     | 1               | 6   |

|              |   |   |   |   |   |   |  |   |   |   |   |   |   |   |   |   |
|--------------|---|---|---|---|---|---|--|---|---|---|---|---|---|---|---|---|
| CsSA<br>UR5  | 1 |   |   | 1 |   |   |  |   |   |   | 1 | 1 | 1 |   | 1 | 6 |
| CsSA<br>UR6  | 1 |   |   | 1 |   |   |  |   |   |   | 1 | 1 | 1 |   | 1 | 6 |
| CsSA<br>UR7  | 1 |   |   | 1 | 1 |   |  | 1 |   |   |   | 1 | 1 | 1 |   | 7 |
| CsSA<br>UR8  |   |   |   |   |   |   |  | 1 |   |   |   | 1 | 1 |   |   | 3 |
| CsSA<br>UR9  |   |   |   | 1 | 1 |   |  |   | 1 | 1 |   | 1 | 1 |   |   | 6 |
| CsSA<br>UR10 |   | 1 |   |   |   | 1 |  |   | 1 | 1 |   | 1 | 1 | 1 | 1 | 8 |
| CsSA<br>UR11 |   |   |   | 1 |   | 1 |  |   |   |   | 1 | 1 | 1 |   |   | 5 |
| CsSA<br>UR12 |   |   |   | 1 |   |   |  |   |   |   |   | 1 | 1 |   | 1 | 4 |
| CsSA<br>UR13 |   |   |   |   |   | 1 |  |   | 1 | 1 |   | 1 | 1 |   | 1 | 6 |
| CsSA<br>UR14 |   | 1 |   |   |   |   |  | 1 | 1 | 1 |   | 1 | 1 |   | 1 | 7 |
| CsSA<br>UR15 |   |   | 1 |   | 1 |   |  |   |   |   |   | 1 | 1 |   | 1 | 5 |
| CsSA<br>UR16 |   |   |   | 1 |   |   |  |   | 1 | 1 |   | 1 | 1 | 1 |   | 6 |
| CsSA<br>UR17 |   |   | 1 | 1 |   |   |  |   | 1 | 1 |   | 1 | 1 | 1 | 1 | 8 |
| CsSA<br>UR18 |   |   |   | 1 |   |   |  |   | 1 | 1 |   | 1 | 1 |   | 1 | 6 |
| CsSA<br>UR19 | 1 |   |   | 1 |   | 1 |  | 1 | 1 | 1 |   | 1 | 1 |   |   | 7 |

|              |   |  |  |   |   |   |   |   |   |   |   |   |   |   |   |   |
|--------------|---|--|--|---|---|---|---|---|---|---|---|---|---|---|---|---|
| CsSA<br>UR20 |   |  |  | 1 |   | 1 |   | 1 | 1 | 1 |   | 1 | 1 |   |   | 7 |
| CsSA<br>UR21 | 1 |  |  |   |   | 1 | 1 | 1 | 1 | 1 |   | 1 | 1 |   |   | 8 |
| CsSA<br>UR22 |   |  |  |   | 1 |   | 1 |   |   |   |   | 1 | 1 |   | 1 | 5 |
| CsSA<br>UR23 |   |  |  |   | 1 |   |   | 1 |   |   |   | 1 | 1 | 1 | 1 | 6 |
| CsSA<br>UR24 |   |  |  |   |   |   |   | 1 |   |   |   |   | 1 |   | 1 | 3 |
| CsSA<br>UR25 |   |  |  | 1 | 1 |   |   | 1 | 1 | 1 | 1 | 1 | 1 |   |   | 8 |
| CsSA<br>UR26 |   |  |  | 1 | 1 | 1 |   | 1 |   |   |   | 1 | 1 |   |   | 6 |
| CsSA<br>UR27 | 1 |  |  | 1 | 1 |   |   | 1 |   |   |   | 1 |   |   |   | 5 |
| CsSA<br>UR28 |   |  |  | 1 |   |   |   | 1 |   |   |   | 1 | 1 |   | 1 | 5 |
| CsSA<br>UR29 |   |  |  | 1 |   |   |   | 1 | 1 | 1 | 1 | 1 |   | 1 | 1 | 8 |
| CsSA<br>UR30 |   |  |  |   |   | 1 |   |   |   |   |   | 1 |   |   |   | 2 |
| CsSA<br>UR31 |   |  |  | 1 |   |   | 1 | 1 |   |   |   | 1 |   | 1 |   | 5 |
| CsSA<br>UR32 |   |  |  | 1 |   |   |   | 1 | 1 | 1 |   | 1 |   |   | 1 | 6 |
| CsSA<br>UR33 |   |  |  | 1 | 1 |   |   |   | 1 | 1 |   | 1 |   |   |   | 5 |
| CsSA<br>UR34 |   |  |  | 1 |   | 1 |   |   | 1 | 1 |   |   |   | 1 | 1 | 6 |

|              |   |   |  |   |   |   |   |   |   |   |  |   |   |   |   |   |
|--------------|---|---|--|---|---|---|---|---|---|---|--|---|---|---|---|---|
| CsSA<br>UR35 |   |   |  | 1 |   |   | 1 |   | 1 | 1 |  | 1 | 1 | 1 | 1 | 8 |
| CsSA<br>UR36 |   |   |  | 1 |   | 1 |   | 1 | 1 | 1 |  |   |   |   |   | 5 |
| CsSA<br>UR37 |   |   |  | 1 |   |   |   |   |   |   |  | 1 | 1 |   |   | 3 |
| CsSA<br>UR38 |   |   |  | 1 |   |   |   | 1 | 1 | 1 |  | 1 |   | 1 |   | 6 |
| CsSA<br>UR39 |   |   |  | 1 |   | 1 |   |   | 1 | 1 |  |   | 1 | 1 |   | 6 |
| CsSA<br>UR40 |   |   |  |   |   | 1 |   | 1 | 1 | 1 |  |   | 1 |   | 1 | 6 |
| CsSA<br>UR41 | 1 |   |  | 1 |   |   | 1 |   | 1 | 1 |  | 1 |   | 1 |   | 7 |
| CsSA<br>UR42 |   |   |  | 1 |   | 1 |   | 1 | 1 | 1 |  | 1 |   |   |   | 6 |
| CsSA<br>UR43 | 1 |   |  |   |   |   |   |   | 1 | 1 |  | 1 |   |   |   | 3 |
| CsSA<br>UR44 |   |   |  | 1 | 1 |   | 1 |   | 1 | 1 |  |   | 1 | 1 | 1 | 8 |
| CsSA<br>UR45 |   |   |  | 1 |   |   |   |   | 1 | 1 |  | 1 |   |   | 1 | 5 |
| CsSA<br>UR46 |   | 1 |  |   |   |   |   | 1 | 1 | 1 |  | 1 |   | 1 | 1 | 7 |
| CsSA<br>UR47 |   |   |  |   | 1 | 1 |   | 1 |   |   |  | 1 | 1 |   | 1 | 6 |
| CsSA<br>UR48 |   |   |  | 1 |   |   |   |   | 1 | 1 |  | 1 |   | 1 | 1 | 6 |
| CsSA<br>UR49 |   | 1 |  | 1 |   |   |   |   | 1 | 1 |  | 1 | 1 | 1 |   | 7 |

|              |   |   |  |   |   |   |   |   |   |   |   |   |   |   |   |        |
|--------------|---|---|--|---|---|---|---|---|---|---|---|---|---|---|---|--------|
| CsSA<br>UR50 |   |   |  |   |   |   |   |   | 1 | 1 |   | 1 | 1 |   |   | 4      |
| CsSA<br>UR51 |   |   |  |   |   |   |   |   | 1 | 1 |   | 1 |   |   |   | 3      |
| CsSA<br>UR52 |   |   |  | 1 | 1 | 1 | 1 | 1 | 1 | 1 |   | 1 | 1 |   | 1 | 1<br>0 |
| CsSA<br>UR53 |   |   |  |   |   |   | 1 |   |   |   |   | 1 | 1 | 1 | 1 | 5      |
| CsSA<br>UR54 |   |   |  |   |   |   |   |   | 1 | 1 | 1 | 1 |   |   | 1 | 5      |
| CsSA<br>UR55 |   |   |  | 1 |   |   |   |   | 1 | 1 |   | 1 | 1 |   | 1 | 6      |
| CsSA<br>UR56 |   |   |  | 1 |   |   |   | 1 | 1 | 1 |   | 1 |   |   | 1 | 6      |
| CsSA<br>UR57 |   |   |  | 1 |   | 1 |   |   | 1 | 1 |   | 1 |   | 1 |   | 6      |
| CsSA<br>UR58 |   | 1 |  | 1 |   | 1 |   | 1 |   |   |   | 1 |   | 1 |   | 6      |
| CsSA<br>UR59 | 1 | 1 |  |   | 1 |   |   |   |   |   |   | 1 |   |   | 1 | 6      |
| CsSA<br>UR60 |   |   |  |   |   |   |   | 1 |   |   |   | 1 | 1 |   |   | 3      |
| CsSA<br>UR61 |   |   |  | 1 |   |   |   | 1 |   |   |   | 1 |   |   |   | 3      |
| CsSA<br>UR62 | 1 |   |  | 1 |   |   |   | 1 | 1 | 1 |   | 1 |   |   |   | 6      |
